# Supplementary material
Source: Springer Nature journal article supplement (https://www.springermedizin.de/resource/supplementary/12885_2012_3669_MOESM1_ESM.pdf/9465878)

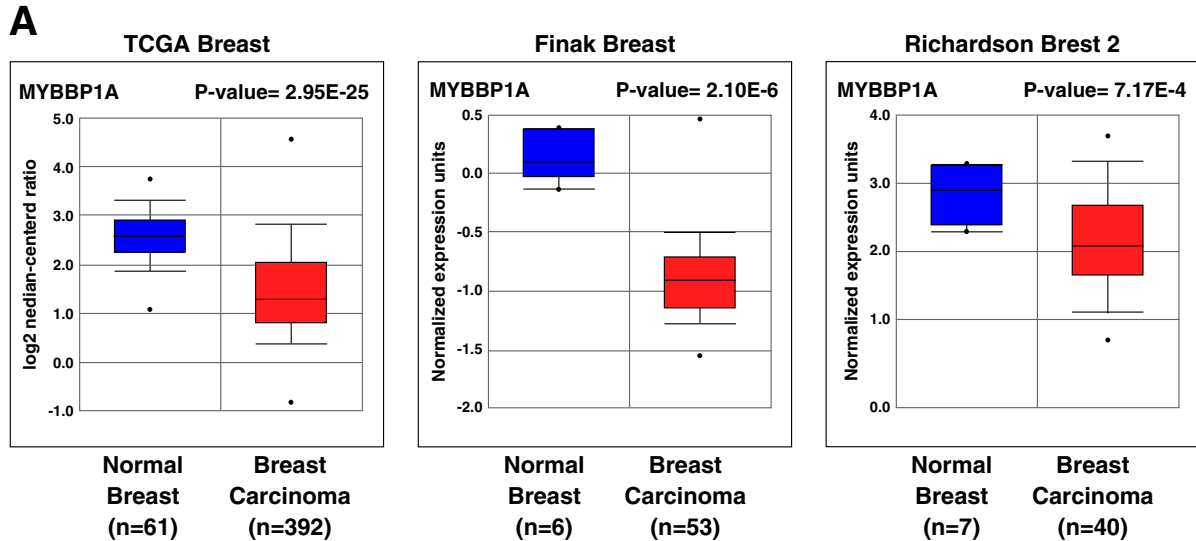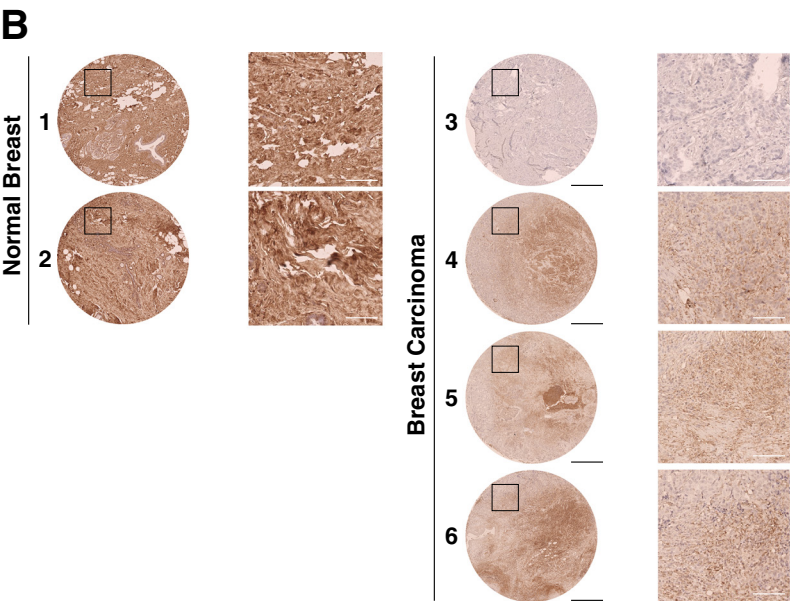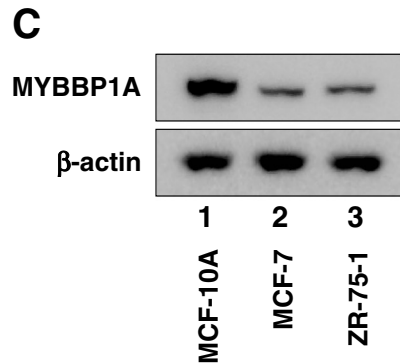

Supplement: MOESM1 [file 9465878]
